# Supplementary material
Source: PubMed Central journal article supplement (PMC1173145)
Supplement: 7600704s3.pdf [file 7600704s3.pdf]

**A**

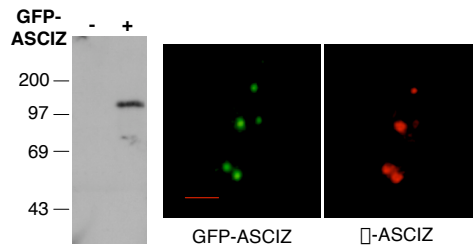

**B**

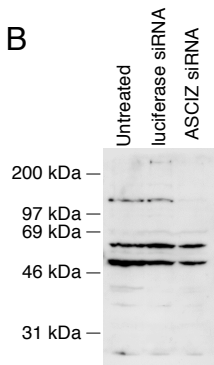

Figure S3. Characterization of the ASCIZ antibody. (A) Western blot of U2OS cell lysates with or without transient GFP-ASCIZ transfection probed with the the ASCIZ antibody (left panel). Immunofluorescence microscopy of MMS-treated GFP-ASCIZ transfected cell using the anti-ASCIZ antibody compared to GFP fluorescence (right panels). Scale bar = 10  $\mu$ m. (B) Western blot analysis of siRNA-treated U2OS cell lyastes using the anti-ASCIZ antibody. Note that the ASCIZ antibody crossreacts with two abundant unrelated proteins (at  $\sim$ 50/60 kDa), limiting its use in immunofluorescence microscopy to overexpressed protein. Also note that endogenous ASCIZ (predicted Mr=72,200) has an aberrant mobility on Western blots (apparent mass  $\sim$ 115 kDa), which is also observed for overexpressed GFP-ASCIZ (predicted  $\sim$ 110 kDa, observed  $\sim$ 140 kDa).
