# Supplementary material
Source: PubMed Central journal article supplement (PMC1173145)
Supplement: 7600704s4.pdf [file 7600704s4.pdf]

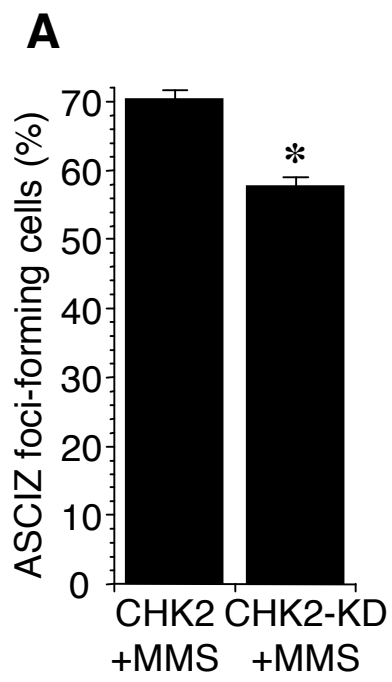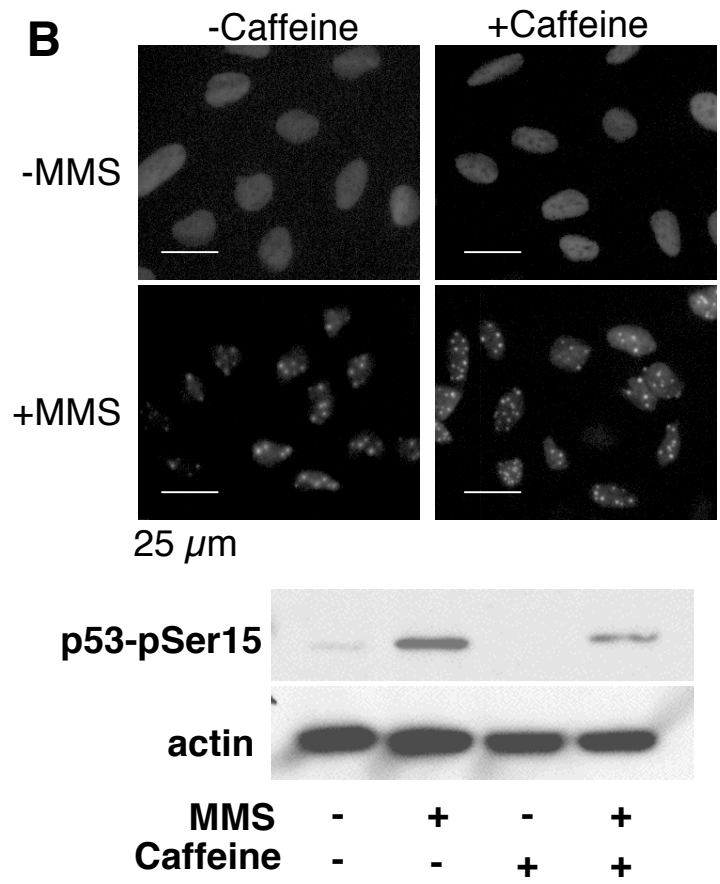

Figure S4. Role of checkpoint kinases in ASCIZ focus formation. (A) MMS-induced ASCIZ focus formation in cells overexpressing wildtype CHK2 or kinase-defective CHK2 in pCDNA4 (mean±S.E. of 4 independent experiments; \*,  $p < 0.01$ , two-sided paired t test). ASCIZ foci were scored in cells overexpressing CHK2 at considerably higher than endogenous levels. (B) ASCIZ focus formation in caffeine-treated cells, and Western blot analysis of p53 serine-15 phosphorylation under the same conditions.
