# Supplementary material
Source: PubMed Central journal article supplement (PMC1173145)
Supplement: 7600704s5.pdf [file 7600704s5.pdf]

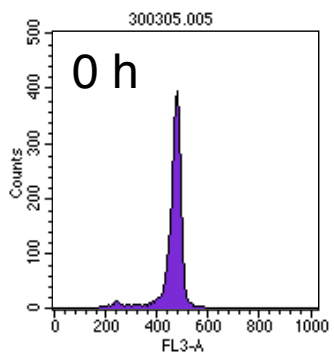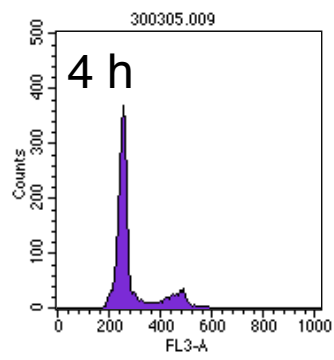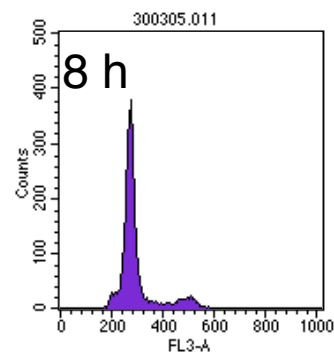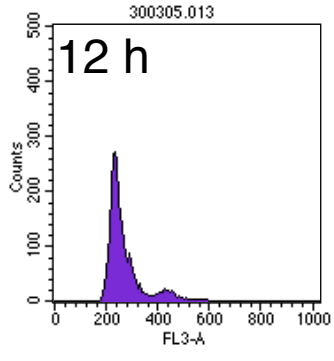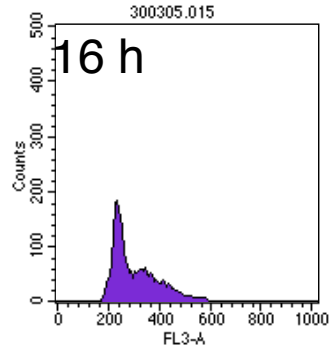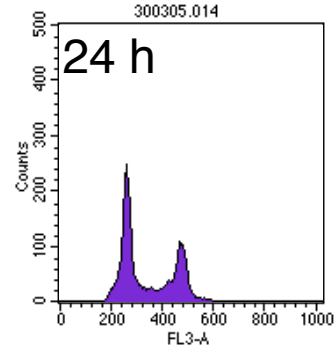

Figure S5. Flow cytometry profiles of propidium-iodide-stained stable GFP-ASCIZ expressing U2OS cells at the indicated times after release from nocodazole arrest. Note the following differences to the corresponding experiment in Fig. 2B: 1) Here cells were released into BrdU-free medium, and 2) cells were directly seeded in petri-dishes rather than on glass coverslips.
