# Supplementary material
Source: PubMed Central journal article supplement (PMC1173145)
Supplement: 7600704s6.pdf [file 7600704s6.pdf]

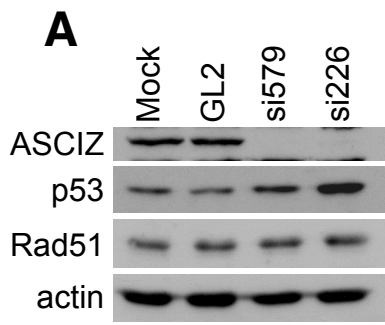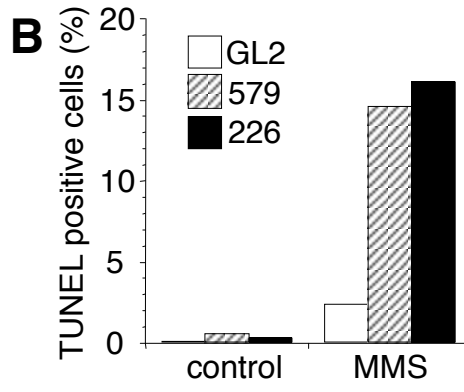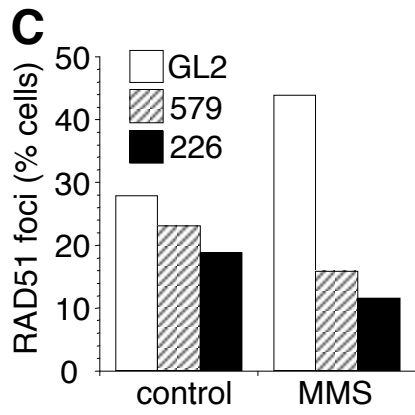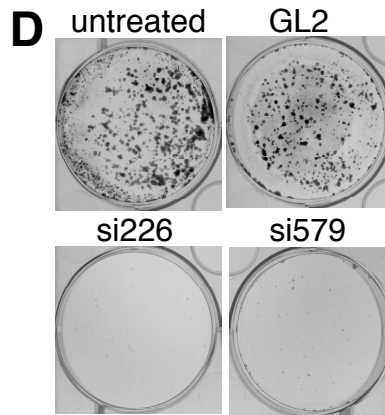

Figure S6. Comparison of two different ASCIZ siRNAs. (A) Western blot of cell lysates from mock, luciferase (GL2), and ASCIZ siRNA 226 or 579 treated U2OS cells probed with anti-ASCIZ, anti-p53, anti-Rad51 and anti-actin antibodies. (B) Apoptosis in U2OS cells treated with the indicated siRNAs 24 hours after MMS treatment as indicated in Fig. 3B. (C) Rad51 focus formation in cells treated with the indicated siRNAs, similar to Fig. 3C. (D) Colony formation of U2OS cells treated with the indicated siRNAs, similar to Fig. 4C.
